# Supplementary material
Source: Springer Nature journal article supplement (https://www.springermedizin.de/resource/supplementary/12881_2010_824_MOESM4_ESM.pdf/9451498)

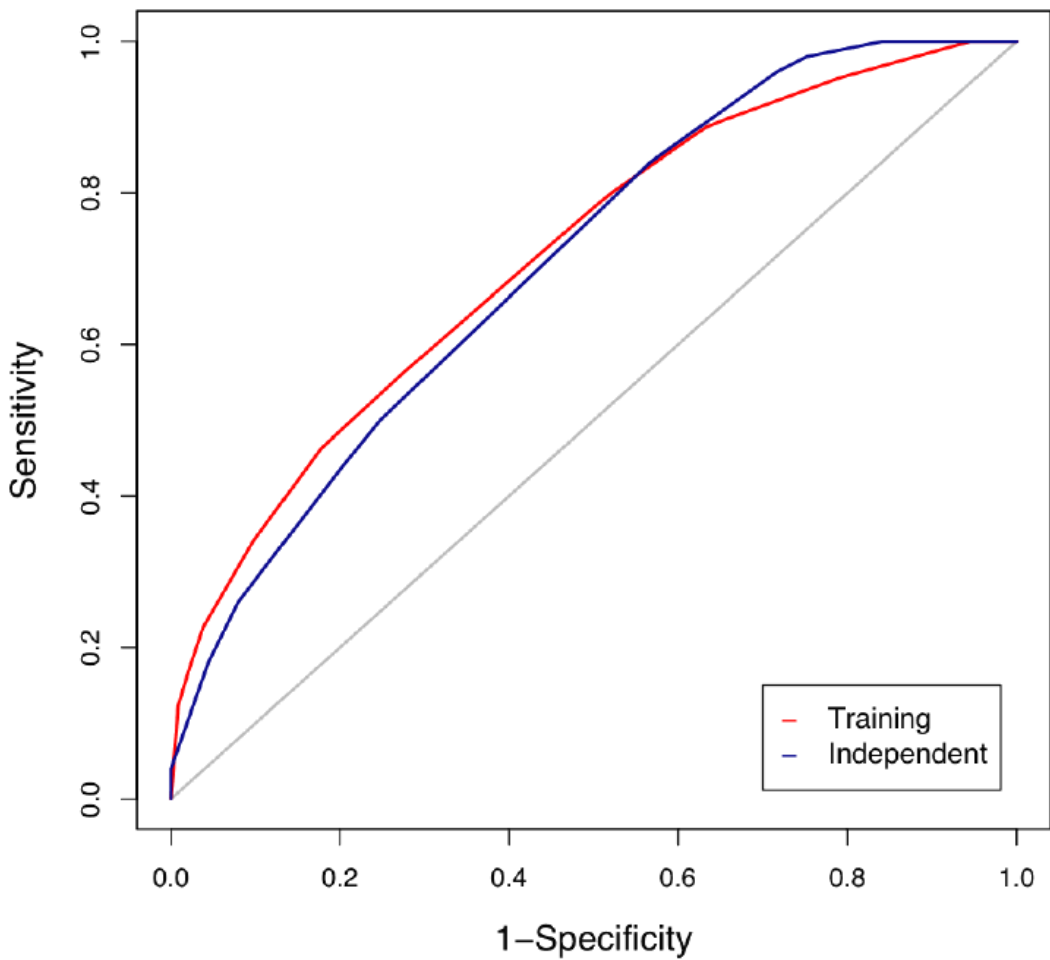

Supplement: MOESM4 [file 9451498]
